# Supplementary material
Source: PubMed Central journal article supplement (PMC4545768)
Supplement: NIHMS712511-supplement-2.pdf [file NIHMS712511-supplement-2.pdf]

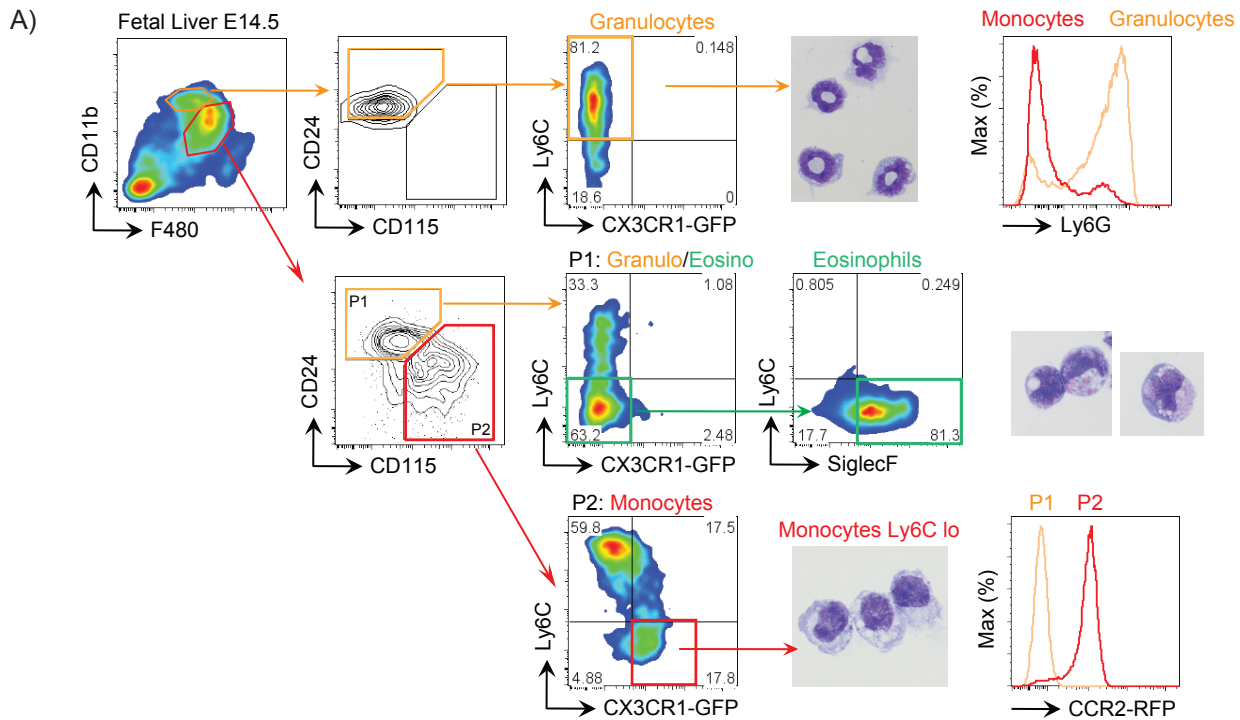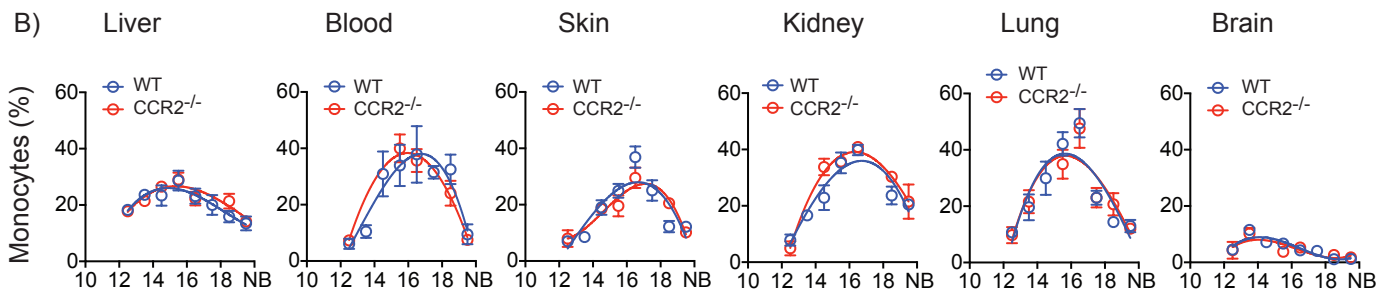

Figure S1: Fetal monocytes express CCR2 but their egress from the fetal liver and tissue seeding is CCR2 independent. *Related to Figure 1*

(A) Flow cytometry analysis of E14.5 FL from (doublet<sup>-</sup>DAPI<sup>+</sup>CD45<sup>+</sup> cells) CX3CR1-GFP and CCR2-RFP embryos. Granulocytes are CD11b<sup>+</sup>F480<sup>-</sup>CD24<sup>+</sup>CD115<sup>-</sup> cells (yellow gate). They appear Ly6C<sup>int</sup> and CX3CR1<sup>-</sup> and Ly6G<sup>+</sup>. GIEMSA staining highlights their typical polymorphonuclear morphology. Other cells, CD24<sup>+</sup>CD115<sup>-</sup>F480<sup>+</sup>Ly6C<sup>int</sup>CX3CR1<sup>-</sup> granulocytes and CD24<sup>+</sup>CD115<sup>-</sup>F480<sup>+</sup>Ly6C<sup>-</sup>SiglecF<sup>+</sup> eosinophils (green gate) are also identified in the CD11b<sup>+</sup>F480<sup>lo</sup> gate. Typical eosin<sup>+</sup> granules are highlighted by GIEMSA staining. Monocytes are CD11b<sup>hi</sup>F480<sup>lo</sup>CD24<sup>lo</sup>CD115<sup>+</sup> cells (red gate). Two populations appear: Ly6C<sup>+</sup> or Ly6C<sup>-</sup> and CX3CR1<sup>+</sup>. Ly6C<sup>lo</sup> monocytes possess more cytoplasm and granules than Ly6C<sup>+</sup> monocytes by GIEMSA staining. Fetal monocytes are CCR2<sup>+</sup> compared to granulocytes in CCR2-RFP embryos. Data are representative of two independent experiments. (B) Relative numbers of fetal monocytes (doublet<sup>-</sup>DAPI<sup>+</sup>CD45<sup>+</sup>CD11b<sup>+</sup>F480<sup>+</sup>CD64<sup>+</sup>Ly6C<sup>+</sup>) were measured by flow cytometry every other day in WT or CCR2<sup>-/-</sup> mice. (n=5-10 from two litters of each group, bars represent mean +/- SEM).

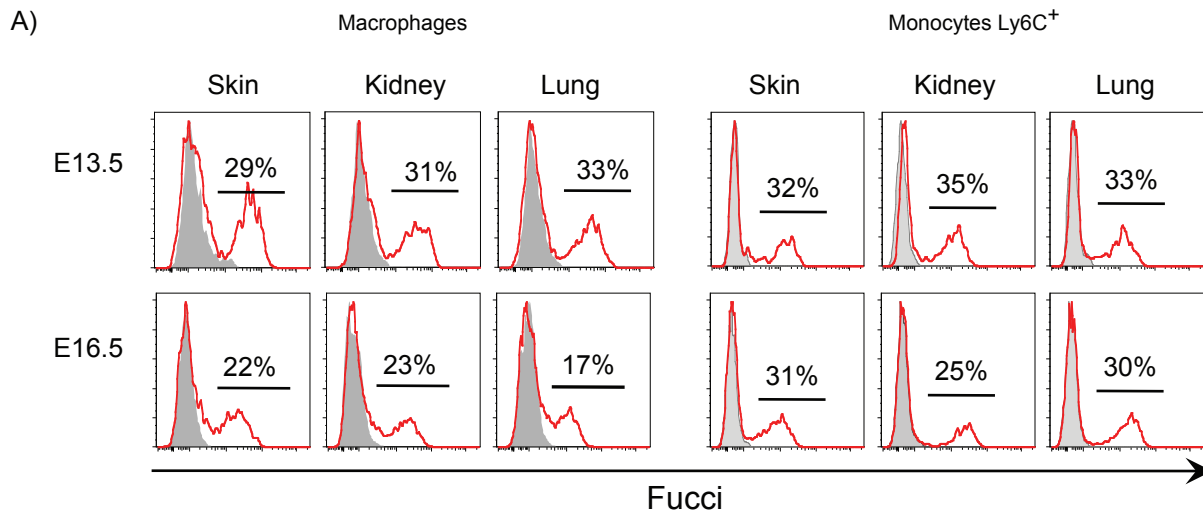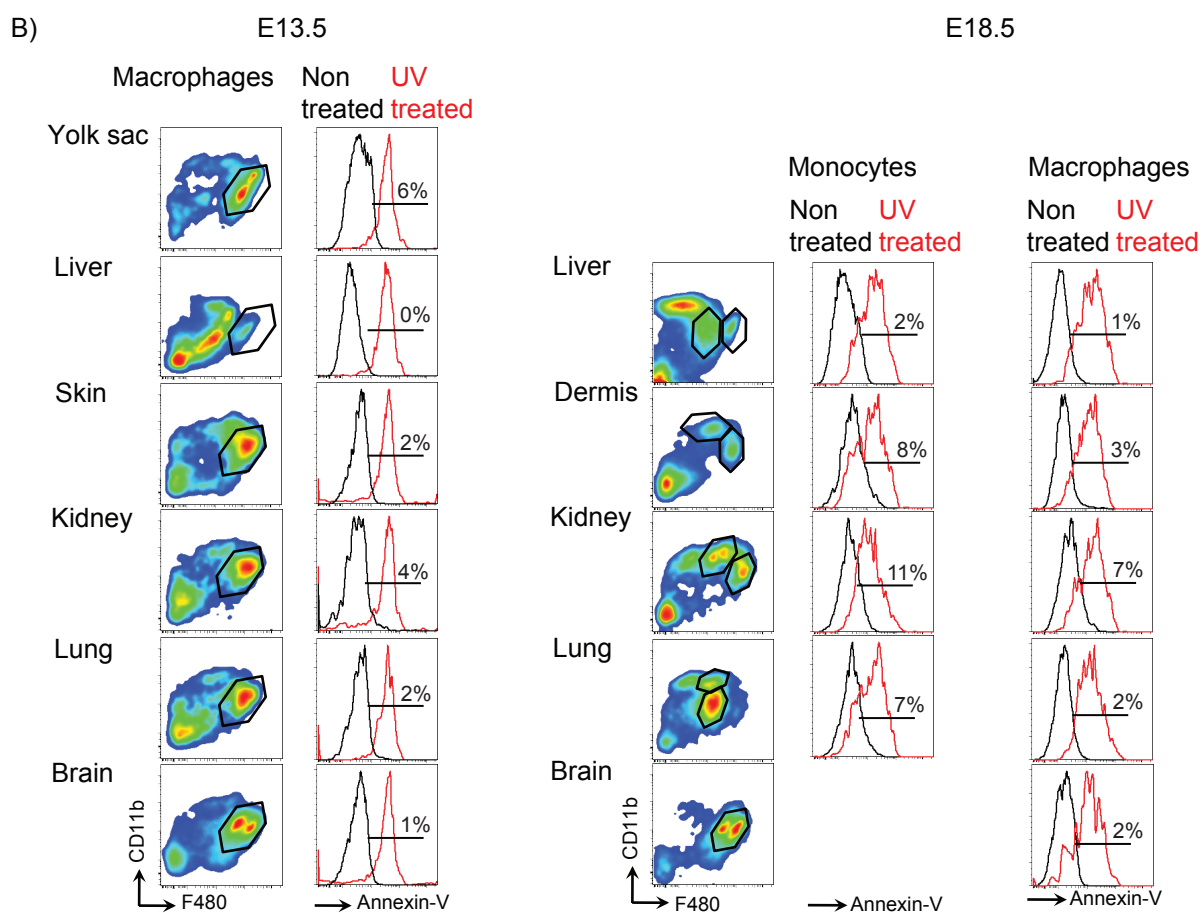

Figure S2: Fetal monocytes and macrophages proliferate in tissues and do not exhibit signs of apoptosis. *Related to Figure 1 and 2*

(A) Flow cytometry analysis of E13.5 and E16.5 Fucci-reporter embryos gated on doublet<sup>-</sup>DAPI<sup>-</sup>CD45<sup>+</sup> cells. Relative numbers of Fucci<sup>+</sup> monocytes and macrophages, gated as in *Figure 1*, are shown. (three independent experiments).

(B) Tissues from E13.5 or E18.5 WT embryos were analyzed by flow cytometry following Annexin-V labelling. Relative numbers of apoptotic monocytes and macrophages, gated as in *Figure 1*, are shown. One representative embryo from 3 to 5 is shown (two independent experiments).

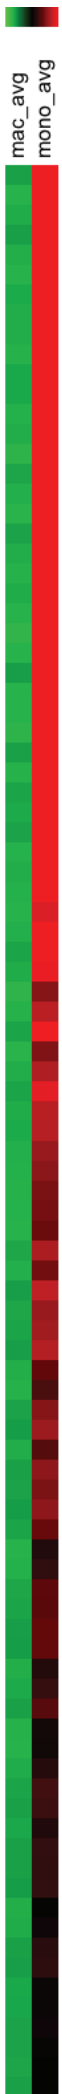

Figure S3A: List of genes expressed by fetal monocytes and not by macrophages. Related to Figure 3.

|    | Symbol        | mac_avg        | mono_avg       |
|----|---------------|----------------|----------------|
| 1  | Sell          | 190.827        | 9125.610       |
| 2  | Lv6c1         | 146.869        | 6767.368       |
| 3  | Xdh           | 168.430        | 5228.261       |
| 4  | Sifn1         | 195.201        | 4675.875       |
| 5  | F10           | 160.193        | 3776.404       |
| 6  | Lcn2          | 148.956        | 3407.892       |
| 7  | Ltf           | 171.603        | 3730.278       |
| 8  | 2010005H15Rik | 161.706        | 3246.730       |
| 9  | Pi16          | 163.593        | 2891.694       |
| 10 | Chi3l1        | 149.799        | 2526.519       |
| 11 | NA            | 175.076        | 2438.127       |
| 12 | Napsa         | 175.721        | 2171.744       |
| 13 | Nxpe4         | 155.720        | 1863.950       |
| 14 | Pira6         | 165.112        | 1936.632       |
| 15 | Amica1        | 135.750        | 1519.459       |
| 16 | Itgb7         | 181.945        | 2015.592       |
| 17 | NA            | 157.869        | 1723.753       |
| 18 | Klra2         | 141.451        | 1495.316       |
| 19 | Ear4          | 189.321        | 1983.292       |
| 20 | Trem1         | 163.908        | 1666.857       |
| 21 | Camp          | 151.329        | 1499.494       |
| 22 | NA            | 167.910        | 1644.467       |
| 23 | NA            | 143.551        | 1377.736       |
| 24 | Chi3l3        | 123.961        | 1132.449       |
| 25 | Chi3l3        | 143.457        | 1283.186       |
| 26 | Hsd11b1       | 196.914        | 1698.839       |
| 27 | Stfa2         | 149.412        | 1285.698       |
| 28 | Fcnb          | 145.611        | 1211.880       |
| 29 | Fcnb          | 136.556        | 1135.400       |
| 30 | Hsd11b1       | 190.825        | 1577.937       |
| 31 | Mefv          | 150.246        | 1229.919       |
| 32 | Aim1          | 185.772        | 1443.263       |
| 33 | NA            | 173.593        | 1334.073       |
| 34 | Dgkg          | 186.526        | 1384.753       |
| 35 | F5            | 152.176        | 1113.985       |
| 36 | Gm5416        | 164.138        | 1198.966       |
| 37 | Mgst1         | 155.856        | 1119.732       |
| 38 | Chi3l4        | 144.153        | 1030.158       |
| 39 | Gpr141        | 158.160        | 1129.752       |
| 40 | NA            | 185.223        | 1220.807       |
| 41 | Mocos         | 168.399        | 1073.962       |
| 42 | Gm5150        | 132.339        | 832.314        |
| 43 | Pira11        | 154.788        | 956.678        |
| 44 | Tmem154       | 185.242        | 1106.063       |
| 45 | Ctsq          | 139.641        | 820.052        |
| 46 | Clec4e        | 161.890        | 933.216        |
| 47 | Rpl3l         | 184.459        | 1054.091       |
| 48 | Lrrk2         | 168.692        | 952.924        |
| 49 | Clec4e        | 171.618        | 951.758        |
| 50 | NA            | 159.268        | 878.246        |
| 51 | Lrrk2         | 155.583        | 848.871        |
| 52 | Galnt9        | 153.620        | 810.165        |
| 53 | Vcan          | 152.060        | 801.017        |
| 54 | Hopx          | 148.605        | 774.670        |
| 55 | Mfsd7a        | 179.992        | 921.676        |
| 56 | Ear10         | 158.742        | 790.701        |
| 57 | Sepx1         | 197.303        | 970.717        |
| 58 | Celsr3        | 180.225        | 879.825        |
| 59 | Gpr35         | 184.380        | 895.983        |
| 60 | Dpep2         | 196.317        | 945.783        |
| 61 | Ear12         | 160.390        | 756.514        |
| 62 | Amica1        | 153.993        | 703.220        |
| 63 | Trem14        | 186.539        | 837.337        |
| 64 | Rab44         | 198.860        | 884.286        |
| 65 | Dpep2         | 164.133        | 726.976        |
| 66 | Tnfaip2       | 193.893        | 855.468        |
| 67 | Cebpe         | 189.449        | 811.582        |
| 68 | Slc52a3       | 199.829        | 852.651        |
| 69 | Tnfsf14       | 184.368        | 770.984        |
| 70 | Pira1         | 145.476        | 602.409        |
| 71 | Fgr           | 157.222        | 646.578        |
| 72 | Pilrb1        | 181.066        | 744.327        |
| 73 | Grk5          | 184.546        | 737.865        |
| 74 | Pqlc3         | 196.280        | 760.970        |
| 75 | Card10        | 198.154        | 758.053        |
| 76 | NA            | 160.583        | 613.263        |
| 77 | NA            | 173.362        | 659.633        |
| 78 | Ccdc125       | 192.175        | 729.409        |
| 79 | Retnlq        | 151.323        | 562.156        |
| 80 | Vcan          | 149.217        | 554.294        |
| 81 | Padi2         | 166.961        | 619.834        |
| 82 | Lbp           | 185.524        | 687.683        |
| 83 | Elane         | 193.932        | 672.707        |
| 84 | Gpr18         | 176.137        | 600.961        |
| 85 | Vnn3          | 193.755        | 655.686        |
| 86 | Vnn3          | 191.305        | 646.366        |
| 87 | <b>S100a4</b> | <b>198.450</b> | <b>650.521</b> |
| 88 | Arhgap26      | 160.544        | 523.433        |
| 89 | Saa3          | 168.607        | 547.551        |
| 90 | Bmx           | 192.389        | 622.969        |
| 91 | Ndrq1         | 197.864        | 640.050        |
| 92 | Tmem71        | 173.925        | 543.167        |
| 93 | Rdh12         | 178.497        | 541.256        |
| 94 | Mapk13        | 186.036        | 547.784        |
| 95 | Cd300lg       | 187.334        | 532.416        |
| 96 | Mapk13        | 183.463        | 519.159        |
| 97 | Padi2         | 192.932        | 511.256        |

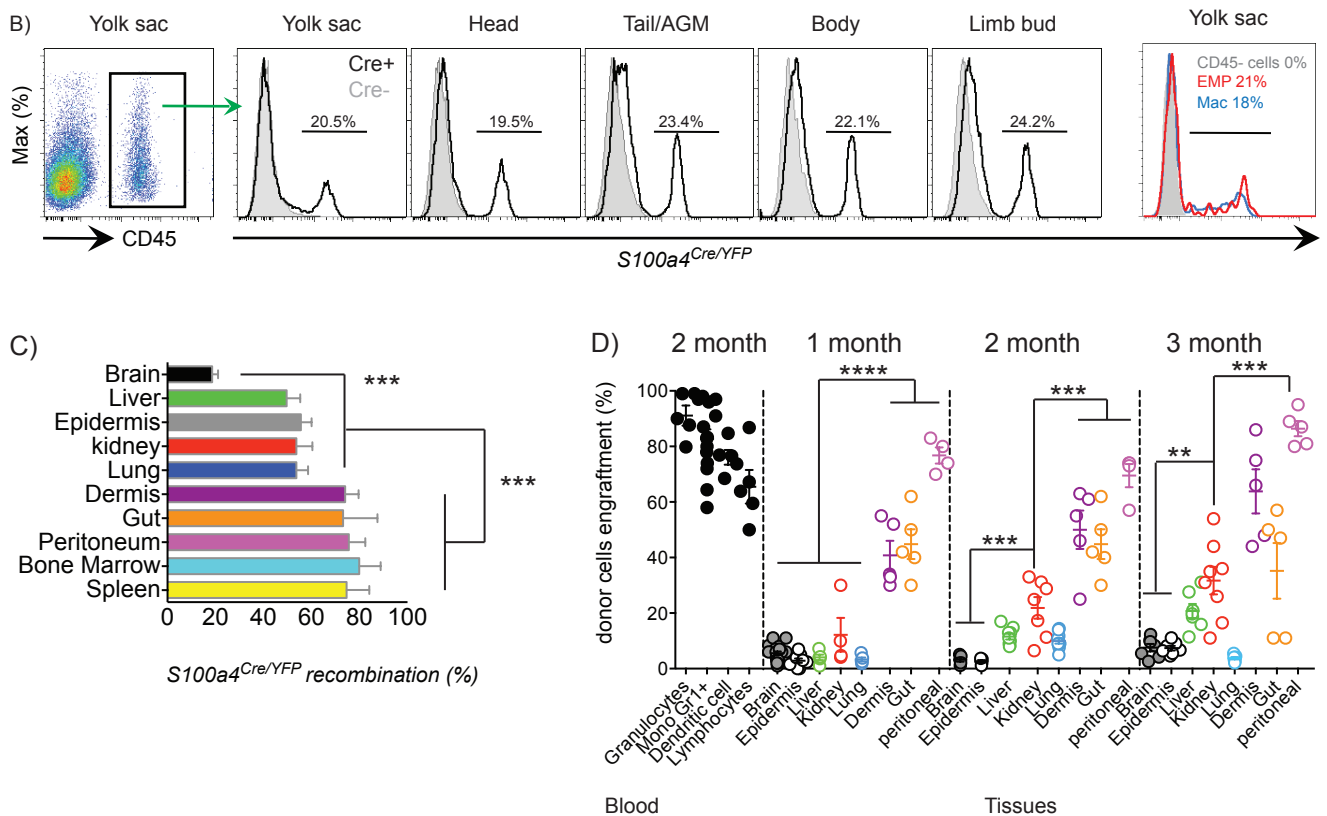

Figure S3:  $S100a4^{Cre/YFP}$  recombination in embryos, adult tissue macrophages and newborn bone marrow transplantation assay. Related to Figure 3.

(A) Skin/dermis monocytes and macrophages were sorted and mRNA was extracted and processed for gene array analysis. Hierarchical clustering of monocytes and macrophages (See also Supplemental Methods) from fetal dermis and epidermis at E16.5 and E17.5 were used to select genes only expressed in fetal monocytes and not in macrophages. Differentially expressed genes (DEGs) were selected by using Linear Models for Microarray Data (Limma) and an FDR cut-off of 0.05. The first 97 genes expressed exclusively by fetal monocytes are shown.  $S100a4$  is highlighted in red in the list.

(B)  $S100a4^{Cre/YFP}$  embryos were collected at E10.5 and analyzed by flow cytometry. Relative numbers of YFP<sup>+</sup> cells within CD45<sup>+</sup> leukocytes from different tissues are presented. (Right) Relative numbers of YFP<sup>+</sup> cells in YS EMPs (Red) and YS macrophages (Blue) are highlighted compared to CD45<sup>-</sup> cells (Grey). One embryo representative from two litters is shown.

(C) Graph shows YFP<sup>+</sup> recombination percentage of tissue-resident macrophages in  $S100a4^{Cre/YFP}$  mice (5 week-old) analyzed by flow cytometry. Bars represent mean +/- SEM from three pooled experiments. The gating strategy for each population was described previously (Ginhoux et al., 2010).

(D) Newborn CD45.2<sup>+</sup> mice were sub-lethally irradiated and reconstituted with bone marrow cells from adult CD45.1<sup>+</sup> mice. The extent of blood leucocyte and tissue macrophage chimerism was measured by flow cytometry at one, two or three months after transplantation. Each dot represents a single mouse. Throughout the figure ANOVA, \* $p < 0.05$ ; \*\*  $p < 0.01$ ; \*\*\* $p < 0.001$ .

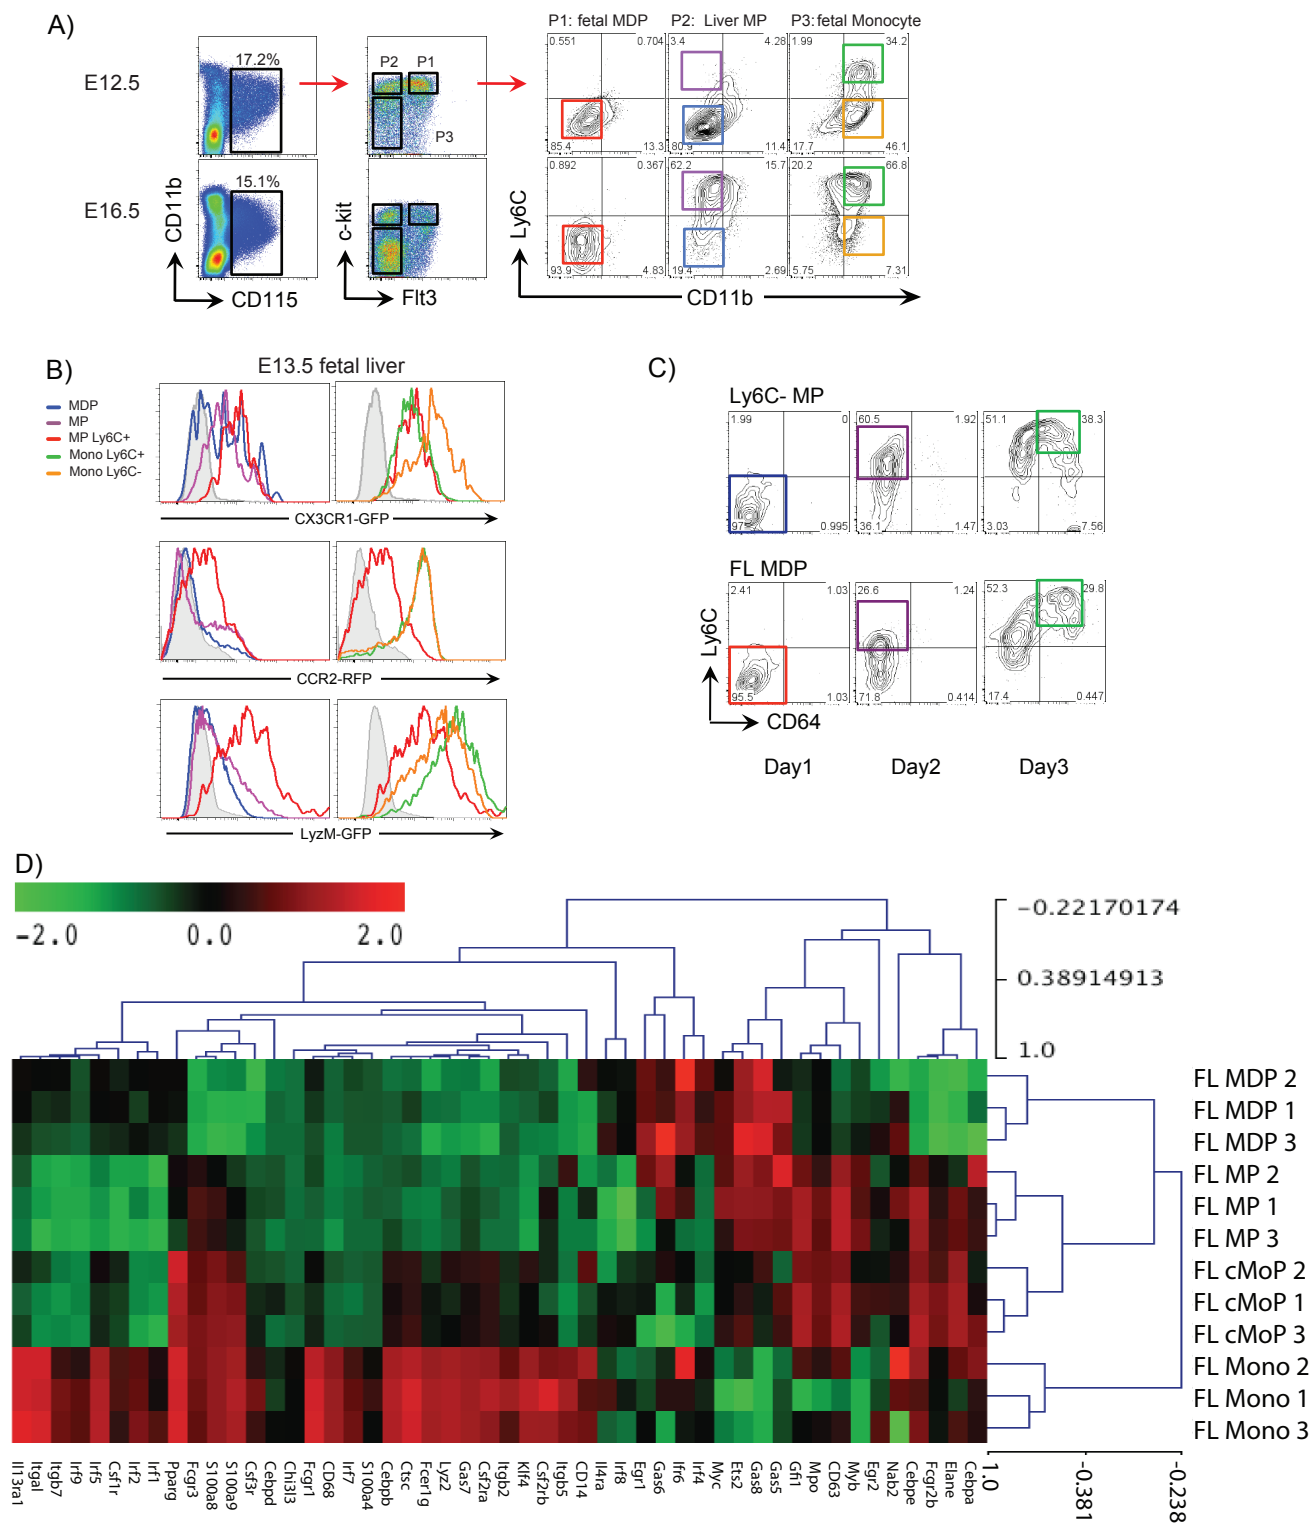

Figure S4: Fetal liver myeloid progenitor phenotype, in vitro potential and gene array analysis. *Related to Figure 4*

(A) FL of E12.5 or E16.5 embryos were analyzed by flow cytometry (doublet<sup>-</sup>DAPI<sup>-</sup>CD45<sup>+</sup> cells). Gating strategy depicts FL MDP (red), FL MP (blue), FL cMoP (purple) and FL monocytes (green) as in *Figure 4A*. FL MP population progressively declines after E16.5. (B) FL myeloid progenitors (as in A) were analysed by in E14.5 CX3CR1-GFP, CCR2-RFP or Lyzozyme-GFP embryos. (C) In vitro culture of FL MDP and FL MP in complete medium supplemented with 10 ng/ml CSF-1. Data are representative of three independent experiments. (D) Heatmap of myeloid genes and transcription factors involved in monopoiesis, adapted from (Friedman, 2002) and (Molawi and Sieweke, 2013). Results show myeloid enrichment in cMoP and monocytes. (E) (Next page) DEG for each myeloid progenitor reveal lymphoid and erythroid gene expression patterns in FL MDP and FL MP respectively. (Left) General heatmap showing DEG for each population (FL and BM). (Middle) DEG list for FL MDP, FL MP and fetal monocytes (Right). Lymphoid genes (red) and erythroid/megakaryocyte genes (blue) for each population are depicted. FL cMoP do not possess specific DEG as they share gene expression patterns with both early progenitors (FL MDP or FL MP) and fetal monocytes. Note that fetal monocytes do not express lymphoid or erythroid genes. See *Supplemental Tables and Methods*.

Row Z-Score

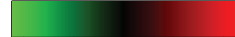

-4 -2 0 2 4

Figure S4E: DEG for each population reveal lymphoid and erythroid gene expression patterns in FL MDP and Ly6C-MP respectively. *Related to Figure 4*

Lymphoid genes  
Erythroid-Megakaryocyte genes

General DEG Heatmap

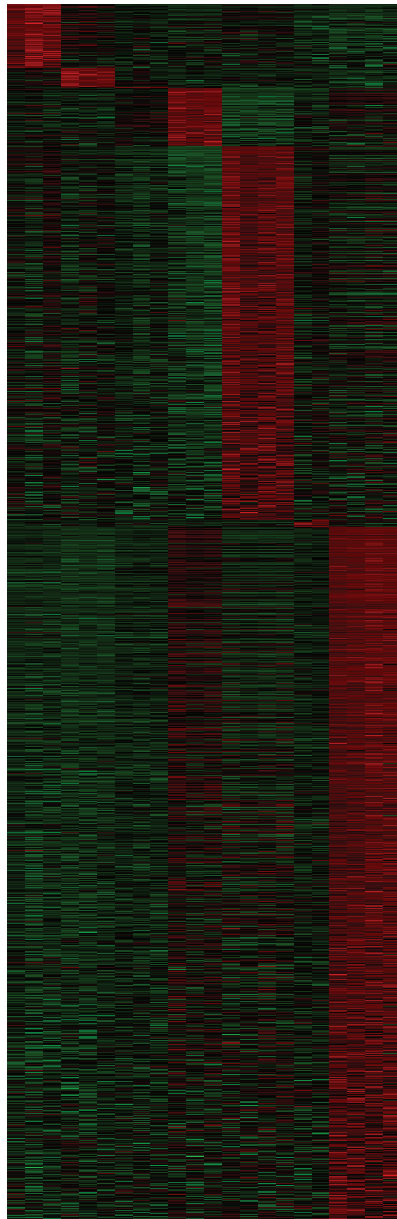

E14.5\_MDP\_FL\_1  
E14.5\_MDP\_FL\_2  
E14.5\_MDP\_FL\_3  
E14.5\_MP\_FL\_1  
E14.5\_MP\_FL\_2  
E14.5\_MP\_FL\_3  
E14.5\_cMOP\_FL\_1  
E14.5\_cMOP\_FL\_2  
E14.5\_cMOP\_FL\_3  
E14.5\_Mono\_Ly6CHL\_FL\_1  
E14.5\_Mono\_Ly6CHL\_FL\_2  
E14.5\_Mono\_Ly6CHL\_FL\_3  
MDP\_1  
MDP\_2  
MDP\_3  
MDP\_4  
A2M\_BM\_cMOP\_1  
A2M\_BM\_cMOP\_2  
Adult\_BM\_G1\_H1\_1  
Adult\_BM\_G1\_H1\_2  
Adult\_BM\_G1\_H1\_3  
Adult\_BM\_G1\_H1\_4

FL MDP DEG Heatmap

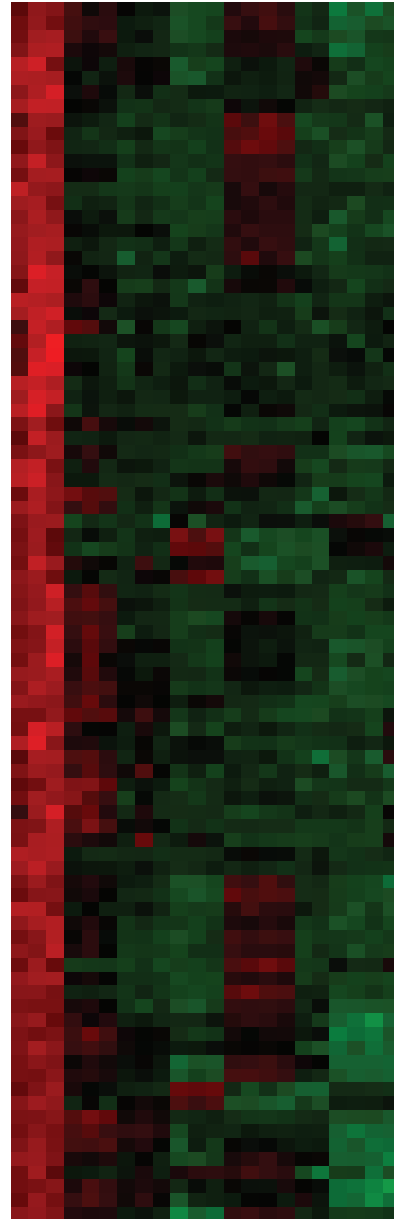

E14.5\_MDP\_FL\_1  
E14.5\_MDP\_FL\_2  
E14.5\_MDP\_FL\_3  
E14.5\_MP\_FL\_1  
E14.5\_MP\_FL\_2  
E14.5\_MP\_FL\_3  
E14.5\_cMOP\_FL\_1  
E14.5\_cMOP\_FL\_2  
E14.5\_cMOP\_FL\_3  
E14.5\_Mono\_Ly6CHL\_FL\_1  
E14.5\_Mono\_Ly6CHL\_FL\_2  
E14.5\_Mono\_Ly6CHL\_FL\_3  
MDP\_1  
MDP\_2  
MDP\_3  
MDP\_4  
A2M\_BM\_cMOP\_1  
A2M\_BM\_cMOP\_2  
Adult\_BM\_G1\_H1\_1  
Adult\_BM\_G1\_H1\_2  
Adult\_BM\_G1\_H1\_3  
Adult\_BM\_G1\_H1\_4

Ptprcap  
Mex3a  
Tmem98  
2900026A02Rik  
Cd28  
Tmem108  
Dab2  
Tox  
Robo4  
Arpp21  
Cobll1  
A1848285  
Emcn  
Kird1  
Tnfrsf13c  
Lck  
Slc27a2  
Gm5111  
Fads3  
Ankrd6  
Bok  
Igsf10  
Grp1  
E5sam  
Lyve1  
Mest  
Oit3  
Pacsin1  
Slc1  
Cimnd2  
Tubb2b  
Rag1  
Thsd1  
Plekhh1  
Enc1  
Pk2  
Dusp16  
Gimap8  
Ccr5  
P2ny13  
Cdkn1c  
Id3  
Rbp1  
Fscn1  
Tspan6  
Itga9  
Dnmt3b  
Ramp2  
Tpm2  
Fbin1  
Neur1fa  
Dlk1  
Serpinh1  
Clec4g  
D0H4S114  
Bex2  
Mmnn1  
Nrv1  
Col18a1  
Ndn  
H19  
Il7r  
2010001M09Rik  
Gm5736  
Gm19590  
Myc1  
Gimap1  
Cnrip1  
Slc35d3  
Emp1  
Gimap6  
Cox6a2  
Dennd3  
Pafah1b3  
Ubtid2  
Sept6  
Ccnd1  
Egfr7  
Dok2  
Tnni2  
Igf2bp2  
Uaca  
Gtf2h3  
Hes6  
BCC046404  
Mrps6  
Itap  
Bcl11a

MP Ly6C- DEG Heatmap

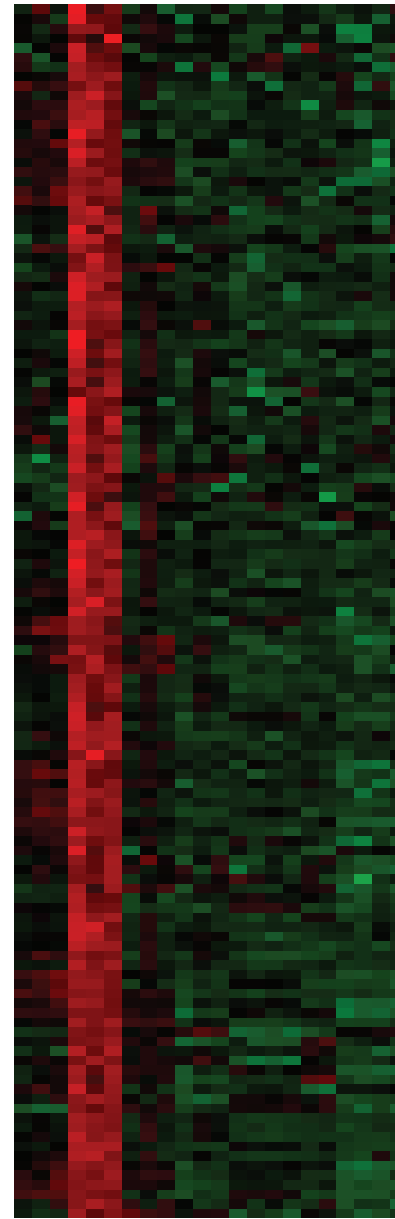

E14.5\_MDP\_FL\_1  
E14.5\_MDP\_FL\_2  
E14.5\_MDP\_FL\_3  
E14.5\_MP\_FL\_1  
E14.5\_MP\_FL\_2  
E14.5\_MP\_FL\_3  
E14.5\_cMOP\_FL\_1  
E14.5\_cMOP\_FL\_2  
E14.5\_cMOP\_FL\_3  
E14.5\_Mono\_Ly6CHL\_FL\_1  
E14.5\_Mono\_Ly6CHL\_FL\_2  
E14.5\_Mono\_Ly6CHL\_FL\_3  
MDP\_1  
MDP\_2  
MDP\_3  
MDP\_4  
A2M\_BM\_cMOP\_1  
A2M\_BM\_cMOP\_2  
Adult\_BM\_G1\_H1\_1  
Adult\_BM\_G1\_H1\_2  
Adult\_BM\_G1\_H1\_3  
Adult\_BM\_G1\_H1\_4

Lefty1  
Gata4  
Il5ra  
Zeb1b  
Acp3  
Prl16  
Epha7  
4533431E20Rik  
Arhgap12  
Home2  
Parr1  
Armpo2  
Gucy1a3  
Gnaz  
Vsn  
Nckap1  
Psmc2  
Tom11  
Pricodp  
Zfp711  
Shank3  
Ctsb  
Mrap  
Gp2  
E54  
Symr1  
C226r3  
Irf1  
2510034M16Rik  
Temp3  
M2  
A730089K16Rik  
Gata1  
6330468B19Rik  
Mfsd2b  
Spsd2  
Slc30a10  
Z5222023  
2510030B18Rik  
Myk3  
Mecp  
Rbpms2  
Gp133  
Prss50  
Slamf1  
Igf3  
Lig3  
Slc45a3  
Gpc4  
Fam110c  
Nipa2  
Acs8  
Naps  
Gp138  
Ddah1  
Rpa2b  
Pdgfra  
Vwf  
Ahr1a2  
Myh10  
Arhgdg  
C205a  
F2r2  
Prlg1  
Fhl1  
Asns  
Cox  
Pcdh7  
Pawr  
Lmna  
Epha  
Icam4  
Ces2g  
Tsp  
Epd1  
Igf1r3  
Rhog  
Pcdg  
Sog2  
Gp9  
Acp11  
Arhgef25  
Ryk  
Nrap  
Parr16  
Aks2  
Reep6  
Sapb  
BC024659  
A2  
Hpk2  
Rgs9p  
Pgf1b  
Slc14a1  
C16d4  
Gp9  
Tmem1  
Tmem56  
Tgm2  
Srhk1  
Trk  
Glt1b  
Fpr1  
Vamp5  
Ptkc1  
Grb10  
Slc7a8  
Acp22  
Sx2zp  
Rissd  
Tbc1d9b  
Vat1  
Cysb3  
Fub  
Tacta2  
Samd14  
A2  
1190007F08Rik  
Cpa3  
Pli  
Gstm5  
Gp3  
Slc24a3  
Egfr  
Fhl10  
1700123O20Rik

FL Mono DEG Heatmap

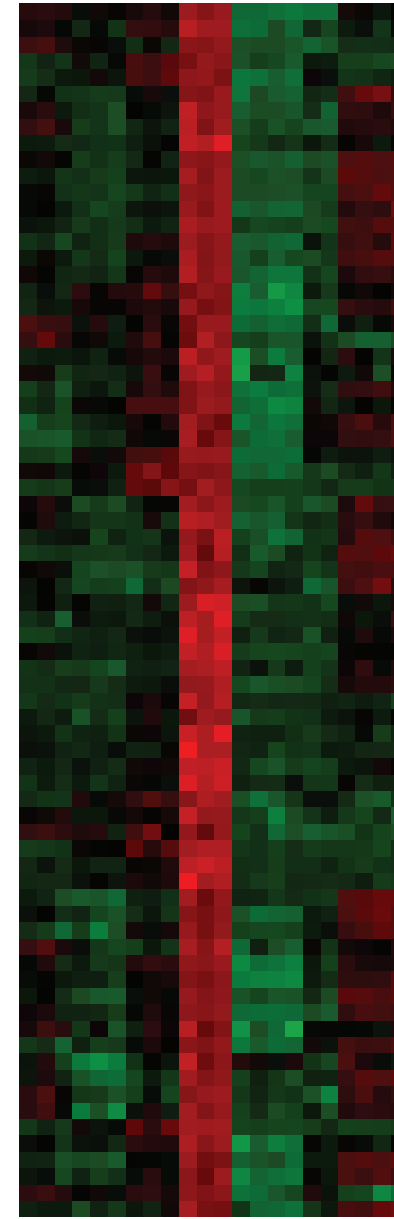

E14.5\_MDP\_FL\_1  
E14.5\_MDP\_FL\_2  
E14.5\_MDP\_FL\_3  
E14.5\_MP\_FL\_1  
E14.5\_MP\_FL\_2  
E14.5\_MP\_FL\_3  
E14.5\_cMOP\_FL\_1  
E14.5\_cMOP\_FL\_2  
E14.5\_cMOP\_FL\_3  
E14.5\_Mono\_Ly6CHL\_FL\_1  
E14.5\_Mono\_Ly6CHL\_FL\_2  
E14.5\_Mono\_Ly6CHL\_FL\_3  
MDP\_1  
MDP\_2  
MDP\_3  
MDP\_4  
A2M\_BM\_cMOP\_1  
A2M\_BM\_cMOP\_2  
Adult\_BM\_G1\_H1\_1  
Adult\_BM\_G1\_H1\_2  
Adult\_BM\_G1\_H1\_3  
Adult\_BM\_G1\_H1\_4

Arid3b  
Ado ra3  
St3gal5  
Mapk13  
Gpr84  
Rab39  
C130050O18Rik  
Kynu  
Gpnm  
Cd86  
Ak8  
Fam129a  
Tmem154  
Gm4788  
Ppfbp2  
Ripk2  
1700026L06Rik  
Gm1673  
Unc119  
Ednr  
Mical2  
Asf1b  
Stag3  
Tirap  
Gm962  
Tmem63a  
Bmx  
Gpx3  
Pparg  
Olfm4  
Fam83f  
Raet1b  
Armc3  
Rusc2  
Id2  
Havcr2  
Clec4n  
Thbs1  
Fam89a  
Slc52a3  
Rpl3l  
Card10  
Cldn1  
Kira17  
Sdk1  
Stfa21l  
Plxn3  
Stfa3  
Ttc39a  
Crispld2  
Hbb-y  
Gm5416  
Stfa2  
2010005H15Rik  
Arhgef11  
Dhrs1  
Gsdmd  
Cryl1  
Wdr1  
Cln3  
Fog rt  
Axl  
Gng2  
Tmem9b  
Tcf19  
Trpv2  
Cttnbip1  
6330416G13Rik  
Gm5483  
Cdkn3  
Aldh3a2  
Leprot  
Birc5  
Coro1b

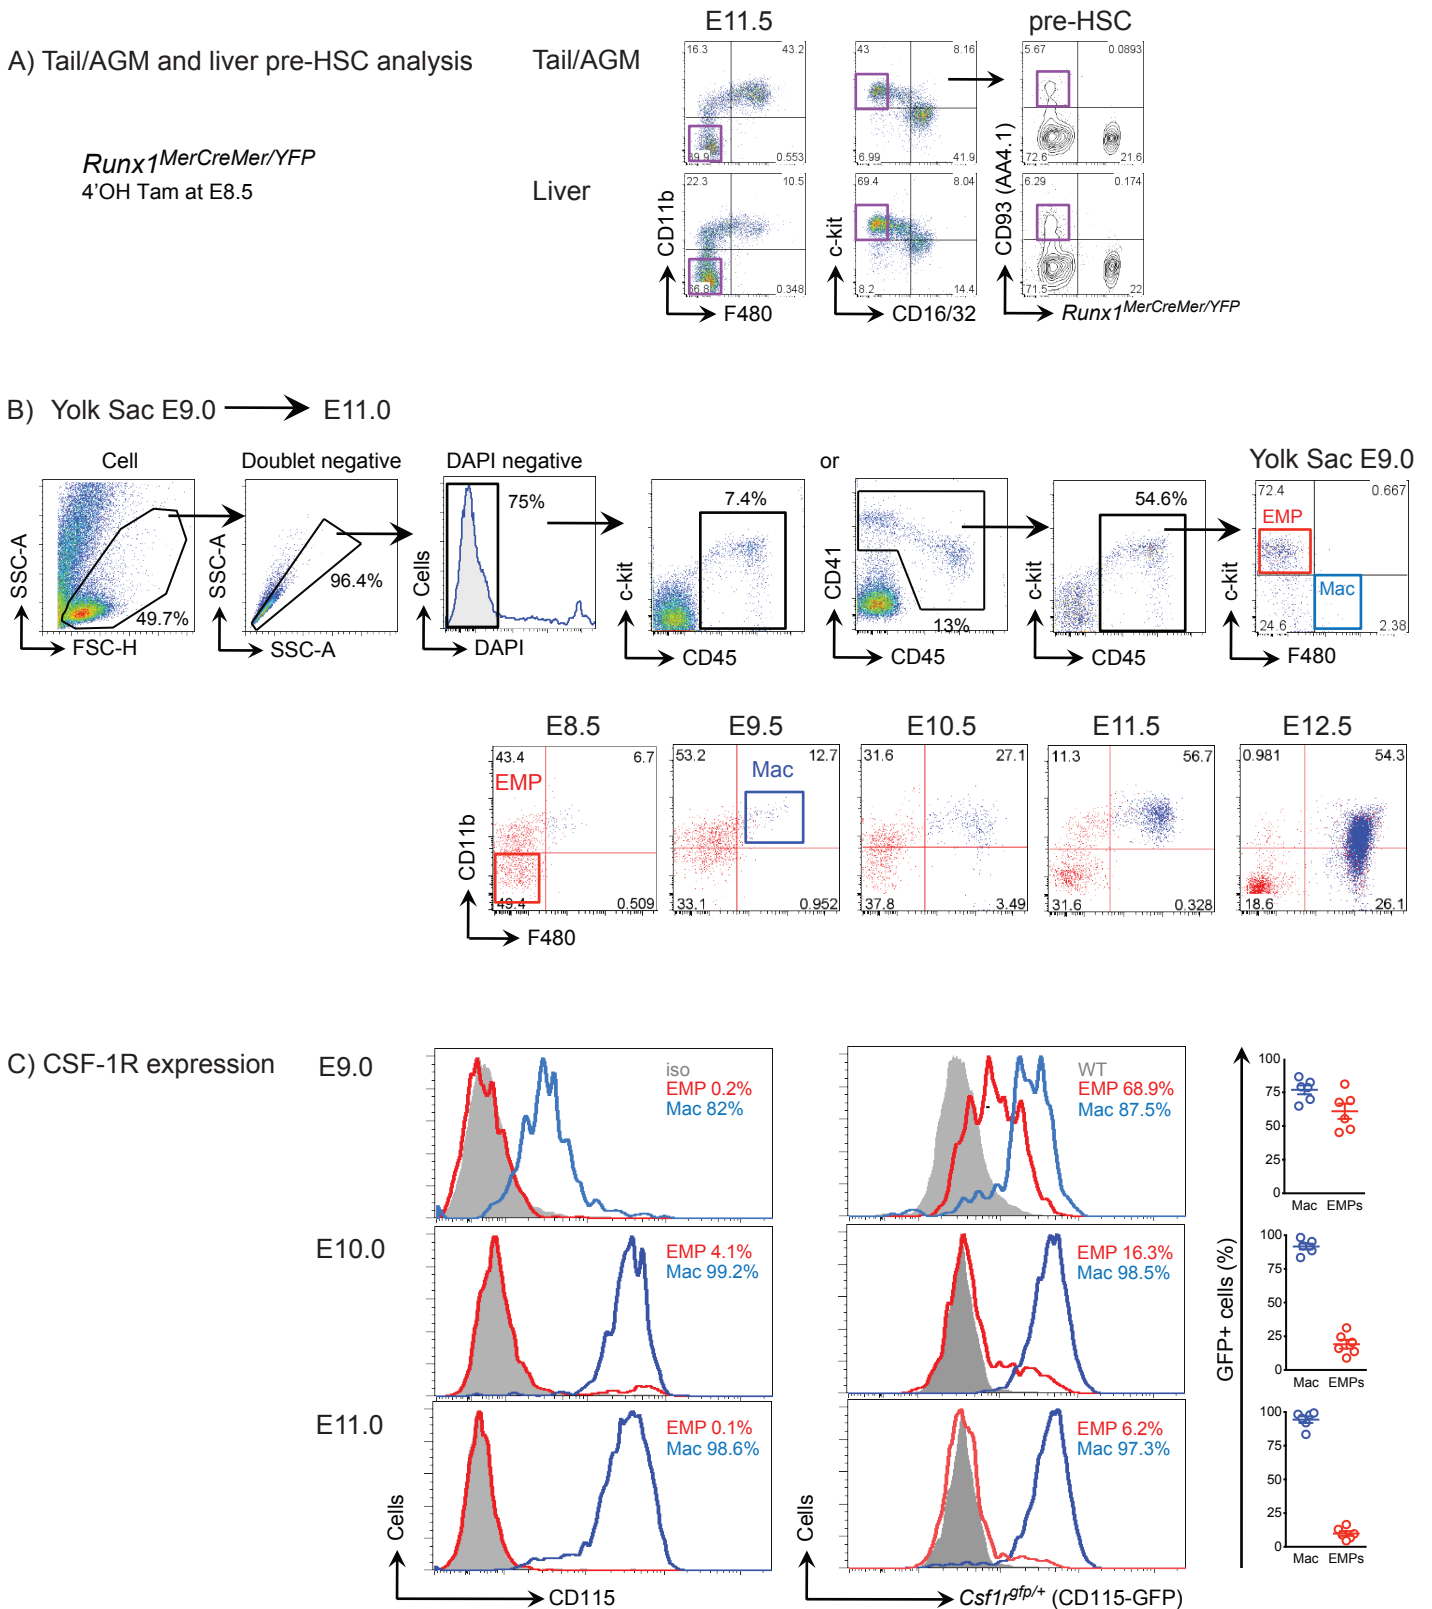

Figure S5: Characterization of Tail/AGM pre-HSC and Yolk sac EMP. *Related to Figure 5.*

(A) *Runx1<sup>MerCreMer</sup>/YFP* embryos were activated at E8.5 with 4'OHT and E11.5 tail/AGM and fetal liver were analyzed. Relative numbers of YFP<sup>+</sup> in c-Kit<sup>+</sup>CD16/32<sup>+</sup>CD93(AA4.1)<sup>+</sup> pre-HSC are shown. (B) Gating strategy to identify EMP and macrophages in the YS. (C) YS EMP and YS macrophages from E9.0 to E11.0 Macrophage Fas-Induced Apoptosis (MAFIA, *Csf1<sup>gfp/+</sup>*) CSF-1R reporter embryos were analyzed for CD115 (CSF-1R) surface expression (left) or mRNA expression (right). Each dot represents one embryo. Results are representative of two independent experiments.

|                                    | FL MDP signature |       | FL Ly6C <sup>+</sup> MP signature |          | FL monocyte signature |      |
|------------------------------------|------------------|-------|-----------------------------------|----------|-----------------------|------|
|                                    | scores           | pVal  | scores                            | pVal     | scores                | pVal |
| E14.5_FL_MDP_1                     | 0.98             | 0     | 0.44                              | 0.006    | -0.45                 | 0    |
| E14.5_FL_MDP_2                     | 1.00             | 0     | 0.46                              | 0        | 0.00                  | 0    |
| E14.5_FL_MDP_3                     | 1.00             | 0     | 0.53                              | 2.00E-04 | -0.59                 | 0    |
| E14.5_FL_MP_Ly6C <sup>-</sup> _1   | 0.36             | 0     | 1.00                              | 0        | -0.67                 | 0    |
| E14.5_FL_MP_Ly6C <sup>-</sup> _2   | 0.59             | 0     | 0.98                              | 0        | -0.64                 | 0    |
| E14.5_FL_MP_Ly6C <sup>-</sup> _3   | 0.36             | 0     | 0.98                              | 0        | -0.79                 | 0    |
| E14.5_FL_cMOP_1                    | -0.68            | 0     | 0.00                              | 0.0247   | 0.32                  | 0    |
| E14.5_FL_cMOP_2                    | 0.00             | 0.023 | 0.55                              | 0        | 0.44                  | 0    |
| E14.5_FL_cMOP_3                    | -0.73            | 0     | 0.40                              | 0.3402   | 0.42                  | 0    |
| E14.5_FL_Mono_Ly6C <sup>+</sup> _1 | -0.64            | 0     | -0.90                             | 0        | 1.00                  | 0    |
| E14.5_FL_Mono_Ly6C <sup>+</sup> _2 | -0.70            | 0     | 0.00                              | 0.14     | 0.98                  | 0    |
| E14.5_FL_Mono_Ly6C <sup>+</sup> _3 | -0.71            | 0     | -0.79                             | 0.1054   | 0.98                  | 0    |
| Adult_BM_MDP_1                     | 0.39             | 0     | -0.64                             | 0.0017   | -0.95                 | 0    |
| Adult_BM_MDP_2                     | 0.35             | 0     | -0.85                             | 7.00E-04 | -0.89                 | 0    |
| Adult_BM_MDP_3                     | 0.39             | 0     | -0.62                             | 0.0048   | -1.00                 | 0    |
| Adult_BM_MDP_4                     | 0.31             | 0     | -0.65                             | 0.0218   | -0.91                 | 0    |
| Adult_BM_cMOP_1                    | -0.90            | 0     | -0.70                             | 0        | -0.49                 | 0    |
| Adult_BM_cMOP_2                    | -0.87            | 0     | -0.61                             | 6.00E-04 | -0.70                 | 0    |
| Adult_BM_Gr1_Hi_1                  | -1.00            | 0     | -1.00                             | 0        | 0.47                  | 0    |
| Adult_BM_Gr1_Hi_2                  | -0.93            | 0     | -0.99                             | 0        | 0.46                  | 0    |
| Adult_BM_Gr1_Hi_3                  | -0.95            | 0     | -0.88                             | 4.00E-04 | 0.43                  | 0    |
| Adult_BM_Gr1_Hi_4                  | -0.83            | 0.003 | -0.98                             | 0.0173   | 0.43                  | 0    |

Table S1: CMAP score and p values of monocytes and monocyte precursors. *Related to Figure 4*

Each signature gene set was used as up and down-regulated genes to perform connectivity map (cMAP) (Lamb et al., 2006) analysis between myeloid progenitors derived from fetal liver or adult bone marrow. The p values were calculated through 1000 permutations. cMAP scores were scaled to the range from -1 to 1. *See Figure 4F and also Supplemental Methods.*



|                                                                                   |      |          |          |           |
|-----------------------------------------------------------------------------------|------|----------|----------|-----------|
| E14.5 FL MDP vs the rest<br>Significant enrichment for E14.5 FL MDP               |      |          |          |           |
| Gene set                                                                          | SIZE | ES       | NES      | FDR q-val |
| <b>LYMPHOID</b>                                                                   | 32   | 0.796789 | 2.201685 | 0         |
| E14.5 FL Ly6C- MP vs the rest<br>Significant enrichment for E14.5 FL Ly6C- MP     |      |          |          |           |
| Gene set                                                                          | SIZE | ES       | NES      | FDR q-val |
| <b>MKE</b>                                                                        | 28   | 0.891902 | 2.421745 | 0         |
| E14.5 FL mono vs the rest<br>Significant enrichment for E14.5 FL mono             |      |          |          |           |
| Gene set                                                                          | SIZE | ES       | NES      | FDR q-val |
| <b>MYELOID</b>                                                                    | 28   | 0.8221   | 2.230084 | 0         |
| E14.5 FL Ly6C- MP vs E14.5 FL MDP<br>Significant enrichment for E14.5 FL Ly6C- MP |      |          |          |           |
| Gene set                                                                          | SIZE | ES       | NES      | FDR q-val |
| <b>MKE</b>                                                                        | 28   | 0.876049 | 2.259854 | 0         |
| <b>MYELOID</b>                                                                    | 28   | 0.748172 | 1.970503 | 0         |
| E14.5 FL cMOP vs E14.5 FL MDP<br>Significant enrichment for E14.5 FL cMOP         |      |          |          |           |
| Gene set                                                                          | SIZE | ES       | NES      | FDR q-val |
| <b>MYELOID</b>                                                                    | 28   | 0.884294 | 2.212854 | 0         |
| E14.5 FL cMOP vs E14.5 FL Ly6C- MP<br>Significant enrichment in E14.5 FL cMOP     |      |          |          |           |
| Gene set                                                                          | SIZE | ES       | NES      | FDR q-val |
| <b>MYELOID</b>                                                                    | 28   | 0.864416 | 2.375983 | 0         |
| E14.5 FL mono vs E14.5 FL MOP<br>Significant enrichment in E14.5 FL mono          |      |          |          |           |
| Gene set                                                                          | SIZE | ES       | NES      | FDR q-val |
| <b>MYELOID</b>                                                                    | 28   | 0.805829 | 1.957614 | 5.60E-04  |

Table S3: GSEA reveals the loss of lymphoid and erythroid potential in cMoP and monocytes and their enrichment in myeloid genes. *Related to Figure 4H.*

Based on the three gene lists edited in *Table S1*, statistical enrichment was calculated for each population as followed: signature genes of FL MDP, FL MP Ly6C Lo, and FL monocytes, DEGs between FL MP Ly6C- vs FL MDP, DEGs between FL cMoP vs FL MDP, DEGs between FL cMoP vs FL MP Ly6C-, DEGs between FL monocytes vs FL cMoP. *See also Supplemental Methods.*

## Supplemental Methods

### Mice.

All experiments were performed on 6-12 week-old animals. *Runx1*<sup>MerCreMer/WT</sup> mice were obtained from Dr Igor Samokhvalov and bred with in-house with *Rosa*<sup>R26R-EYFP/R26R-EYFP</sup> mice as described in (Samokhvalov et al., 2007). *S100a4*<sup>Cre/WT</sup> [BALB/c-Tg(*S100a4*<sup>Cre</sup>)1Egn/YunkJ] were purchased from the Jackson Laboratory and bred in-house with *Rosa*<sup>R26R-EYFP/R26R-EYFP</sup> mice. Flt3-Switch mice were generated by crossing *Flt3*<sup>Cre/WT</sup> mice with R26<sup>Tomato/GFP</sup> [B6.129(Cg)-Gt(ROSA)26S<sup>tm4(CTB-tdTomato,-EGFP)Luo</sup>/J] mice, and were bred at the University of California, Santa Cruz. *Csf1*<sup>r<sup>MerCreMer/WT</sup></sup> mice were purchased from the Jackson Laboratory and were crossed with the *Rosa*<sup>R26R-EYFP/R26R-EYFP</sup> reporter mice. Macrophage Fas-Induced Apoptosis (MAFIA) [[C57BL/6-Tg\(Csf1r-EGFP-NGFR/FKBP1A/TNFRSF6\)2Bck/J](#)] were purchased from the Jackson Laboratory. *Cx3cr1*<sup>+/<sup>gfp</sup></sup> mice (Jung et al., 2000) and *Ccr2*<sup>+/<sup>rfp</sup></sup> mice (Saederup et al., 2010) were maintained on a C57BL/6 background. C57BL/6 mice or heterozygous embryos were used as controls. Fucci-492 mice (Sakaue-Sawano et al., 2008) were purchased from the Riken BioResource Center (Ibaraki, Japan). Lysozyme-GFP mice were kindly provided by Dr. Thomas Graf of the Centre for Genomic Regulation, Barcelona, Spain (Faust et al., 2000). All experiments and procedures were approved by the Institutional Animal Care and Use Committee (IACUC), in accordance with the guidelines of the Agri-Food and Veterinary Authority (AVA) and the National Advisory Committee for Laboratory Animal Research (NACLAR) of Singapore.

### Flow cytometry

Fluorochrome- or biotin- conjugated monoclonal antibodies (mAbs) specific for mouse CD11b (M1/70), CD45 (30F11), CD45.1 (A20), CD45.2 (104), CSF-1R (also called CD115; AFS98), Ly6C (AL21), Ly6G (1A8) CD3 (17A2), CD19 (1D3), NK1.1 (PK136), Ter119 (Ter119), Sca-1 (D7), CD93 (AA4.1), CD48 (hm48-1), CD150 (TC15-12F12.2), Flt3-biotin (A2F10), c-kit (also called CD117; 2B8), MerTK (108921), CD64 (X54-5/7.1) CD24 (M1/69), CD41 (MWReg30), CD16/32 (93)

CD34 (RAM34), Siglec-F (E50-2440), the corresponding isotype-matched controls and secondary reagents were purchased either from BD Biosciences or eBioscience. Anti-F4/80 (A3-1) mAb was purchased from Serotec (Raleigh, NC). Anti-F4/80 (A3-1) mAb was purchased from Serotec (Raleigh, NC)

### **Imaging procedures.**

For cytopsin preparations, corresponding myeloid progenitors were sorted using a FACS ARIA II (BD Biosciences) to achieve 98% purity. Purified cells were spun onto glass slides, dried for 20 minutes, stained for 1 minute in 0.3% Wright solution (Sigma), and rinsed in distilled water. Images were captured using a Nikon Eclipse E800 microscope (Nikon, Japan; Nikon Imaging Center, Chronos, Biopolis) at a 10 × 100-fold magnification.

### **Quantitative RT-PCR**

Total RNA was extracted using the RNeasy Mini Kit (QIAGEN), and cDNA was synthesized with random hexamers and SuperScript III reverse transcriptase. For real-time PCR, cDNA products equivalent to RNA from 2,000 cells were amplified with a LightCycler\_480 and SYBR Green I Master mix (Roche Diagnostics). The data were normalized to the amounts of *gapdh* RNA expression in each sample. The primers used for RT-PCR were as follows: *S100a4* FW: 5'-AGG AGC TAC TGA CCA GGG AG -3'; *S100a4* RV: 5'-CCT GTT GCT GTC CAA GTT GC-3'; *c-Myb* FW: 5'-TCA CCA GCA AGG TGC ATG AT-3'; *c-Myb* RV: 5'-TGC TGG AAG TGT AGA AAG A-3'; *Gapdh* FW: 5'-TGC GAC TTC AAC AGC AAC TC-3'; *Gapdh* RV: 5'-ATG TAG GCC ATG AGG TCC AC-3'

### **Gene array**

Total RNA was extracted using the Life Technologies mirVana™ miRNA Isolation Kit (Ambion Inc, Austin, TX, USA). Agilent Bioanalyzer was used to assess RNA integrity and the RNA Integrity Number (RIN) was calculated. Only samples with a RIN ≥ 7 RNA were processed. Fifty ng of total RNA were used to prepare biotinylated cRNA using the TargetAmp™ Nano-g™ Biotin-aRNA Labeling Kit for the Illumina® System (Epicentre). Target cRNA was hybridized to the Illumina Mouse WG6 v2 Beadchips. Arrays were scanned using BeadArray Scanner 500GX at

the Biopolis Shared Facility, A\*STAR, Singapore. Images were analyzed using the Illumina GenomeStudio Gene Expression v 1.9.0 software.

### Microarray analysis

Microarray data was normalized by quantile normalization. Hierarchical clustering of samples was generated using Pearson's correlation and complete agglomeration method. Differentially expressed genes (DEGs) were selected by using Linear Models for Microarray Data (Limma) (Diboun et al., 2006) and a False Discovery Rate (FDR) cut-off of 0.05. Hierarchical clustering of monocytes and macrophages from fetal dermis and epidermis at E16.5 and E17.5 were used to select DEGs only expressed in fetal monocytes and not in macrophages (See below and **Figure 3F** and **Figure S4**). Hierarchical clustering of myeloid progenitors and monocytes, in fetal liver and adult bone marrow, indicated similar monocytes development between fetal liver and bone marrow. In order to identify differences between fetal and adult monocytes, Limma was used to select genes that are up or down-regulated in fetal monocytes compared to adult monocytes (**Figure 4E**). Bio-functions significantly enriched in these DEGs were identified by Ingenuity Pathway Analysis software (**Figure 4E**).

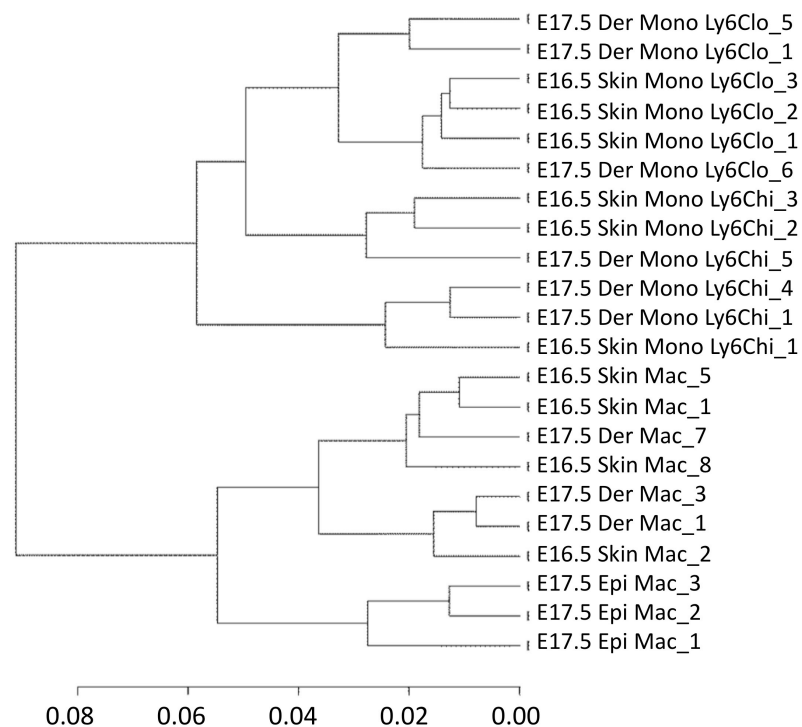

Hierarchical clustering of monocytes and macrophages at E16.5 and E17.5.

### **cMAP analysis**

Signature genes of FL MDP, Ly6C<sup>-</sup>MP and monocytes were identified using Limma to compare each myeloid progenitor and monocytes to each other (**Figure S4 and Figure 4F**). Each signature gene set was used as up and down-regulated genes to perform connectivity map (cMAP) (Lamb et al., 2006) analysis between myeloid progenitors derived from FL or adult bone marrow. The p values were calculated through 1000 permutations. cMAP scores were scaled to the range from -1 to 1. Cell types with positive cMAP score correlate with the corresponding cell type used as reference (Maximum score of 1) for cMAP analysis (See also **Table S1** for CMAP statistical data).

### **GSEA analysis**

Three gene sets respectively termed Megakaryocytes/Erythrocytes (MkE), Myeloid and Lymphoid were collected from (Boiers et al., 2013). Entrez gene IDs of these three gene sets are listed in **Table S2**. Gene set enrichment analysis (GSEA) was performed with the GSEA software (Subramanian et al., 2005) using the three gene sets for the following sets of signature genes: signature genes of FL MDP, FL Ly6C<sup>-</sup>MP and FL monocytes, DEGs between FL MP Ly6C<sup>-</sup> vs FL MDP, DEGs between FL cMoP vs FL MDP, DEGs between FL cMoP vs FL Ly6C<sup>-</sup>MP, DEGs between FL monocytes vs FL cMoP. See also **Table S3** for GSEA enrichment results.

### **Supplemental References**

Boiers, C., Carrelha, J., Lutteropp, M., Luc, S., Green, J.C., Azzoni, E., Woll, P.S., Mead, A.J., Hultquist, A., Swiers, G., *et al.* (2013). Lymphomyeloid contribution of an immune-restricted progenitor emerging prior to definitive hematopoietic stem cells. *Cell stem cell* *13*, 535-548.

Diboun, I., Wernisch, L., Orengo, C.A., and Koltzenburg, M. (2006). Microarray analysis after RNA amplification can detect pronounced differences in gene expression using limma. *BMC genomics* *7*, 252.

Faust, N., Varas, F., Kelly, L.M., Heck, S., and Graf, T. (2000). Insertion of enhanced green fluorescent protein into the lysozyme gene creates mice with green fluorescent granulocytes and macrophages. *Blood* *96*, 719-726.

Friedman, A.D. (2002). Transcriptional regulation of granulocyte and monocyte development. *Oncogene* *21*, 3377-3390.

Ginhoux, F., Greter, M., Leboeuf, M., Nandi, S., See, P., Gokhan, S., Mehler, M.F., Conway, S.J., Ng, L.G., Stanley, E.R., *et al.* (2010). Fate mapping analysis reveals that adult microglia derive from primitive macrophages. *Science* *330*, 841-845.

Jung, S., Aliberti, J., Graemmel, P., Sunshine, M.J., Kreutzberg, G.W., Sher, A., and Littman, D.R. (2000). Analysis of fractalkine receptor CX(3)CR1 function by targeted deletion and green fluorescent protein reporter gene insertion. *Molecular and cellular biology* *20*, 4106-4114.

Lamb, J., Crawford, E.D., Peck, D., Modell, J.W., Blat, I.C., Wrobel, M.J., Lerner, J., Brunet, J.P., Subramanian, A., Ross, K.N., *et al.* (2006). The Connectivity Map: using gene-expression signatures to connect small molecules, genes, and disease. *Science* *313*, 1929-1935.

Molawi, K., and Sieweke, M.H. (2013). Transcriptional control of macrophage identity, self-renewal, and function. *Advances in immunology* *120*, 269-300.

Saederup, N., Cardona, A.E., Croft, K., Mizutani, M., Cotleur, A.C., Tsou, C.L., Ransohoff, R.M., and Charo, I.F. (2010). Selective chemokine receptor usage by central nervous system myeloid cells in CCR2-red fluorescent protein knock-in mice. *PloS one* *5*, e13693.

Sakaue-Sawano, A., Kurokawa, H., Morimura, T., Hanyu, A., Hama, H., Osawa, H., Kashiwagi, S., Fukami, K., Miyata, T., Miyoshi, H., *et al.* (2008). Visualizing spatiotemporal dynamics of multicellular cell-cycle progression. *Cell* *132*, 487-498.

Samokhvalov, I.M., Samokhvalova, N.I., and Nishikawa, S. (2007). Cell tracing shows the contribution of the yolk sac to adult haematopoiesis. *Nature* *446*, 1056-1061.

Subramanian, A., Tamayo, P., Mootha, V.K., Mukherjee, S., Ebert, B.L., Gillette, M.A., Paulovich, A., Pomeroy, S.L., Golub, T.R., Lander, E.S., and Mesirov, J.P. (2005). Gene set enrichment analysis: a knowledge-based approach for interpreting genome-wide expression profiles. *Proceedings of the National Academy of Sciences of the United States of America* *102*, 15545-15550.
